# Supplementary material for: Asymmetric Sensory-Motor Regeneration of Transected Peripheral Nerves Using Molecular Guidance Cues
Source: PubMed Central journal article supplement (PMC5662603; doi:10.1038/s41598-017-14331-x), 2017-10-30
Supplement: 41598_2017_14331_MOESM1_ESM.pdf [file 41598_2017_14331_MOESM1_ESM.pdf]

Asymmetric Sensory-Motor Regeneration of Transected Peripheral Nerves Using Molecular  
Guidance Cues

Sanjay Anand<sup>1</sup>, Vidhi Desai<sup>2</sup>, Nesreen Alsmadi<sup>1</sup>, Aswini Kanneganti<sup>1</sup>, Dianna Huyen-Tram  
Nguyen<sup>2</sup>, Martin Tran<sup>2</sup>, Lokesh Patil<sup>1</sup>, Srikanth Vasudevan<sup>5</sup>, Cancan Xu<sup>2</sup>, Yi Hong<sup>2</sup>, Jonathan  
Cheng<sup>3</sup>, Edward Keefer<sup>4</sup> and Mario I. Romero-Ortega<sup>1\*</sup>

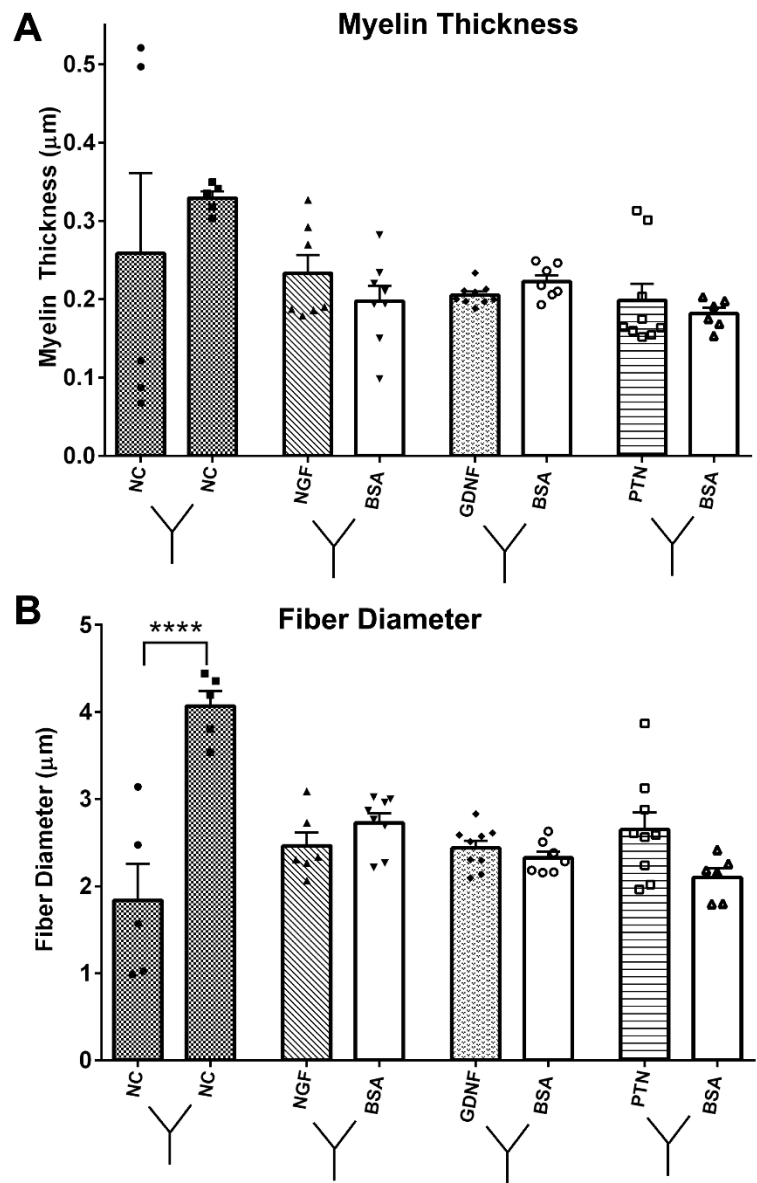

**Supplementary Figure S1:** NTFs effect on (A) myelin thickness and (B) Fiber diameter when compared to BSA. n = number of sampled EM pictures per group. \*\*\*\* P ≤ 0.0001.
